# Supplementary material for: Assessment of Total Lesion Glycolysis by 18F FDG PET/CT Significantly Improves Prognostic Value of GEP and ISS in Myeloma
Source: Oxford University Press journal article supplement (doi:10.1158/1078-0432.ccr-16-0235), 2016-10-03
Supplement: 10780432ccr160235-sup-161640_2_supp_3603864_jb1jvc.docx [file 10780432ccr160235-sup-161640_2_supp_3603864_jb1jvc.docx]

| Variable | Current dataset  (n = 192) | Omitted data  (n = 111) |
| --- | --- | --- |
| Age >= 65 years | 51/192 (27%) | 33 / 111 (30%) |
| Albumin < 3.5 g/dL | 55/192 (29%) | 38 / 111 (34%) |
| B2M >= 3.5 mg/L | 83/192 (43%) | 49 / 111 (44%) |
| B2M > 5.5 mg/L | 34/192 (18%) | 26 / 111 (23%) |
| Creatinine >= 2.0 mg/dL | 11/192 (6%) | 12 / 111 (11%) |
| CRP >= 8 mg/L | 64/192 (33%) | 37 / 111 (33%) |
| LDH >= 190 U/L | 57/192 (30%) | 25 / 111 (23%) |
| Platelet Count < 150 x 109/L | 26/192 (14%) | 11/111 (10%) |
| GEP70 High Risk | 27/176 (15%) | 14 / 106 (13%) |
| GEP Proliferation Index >= 10 | 22/176 (12%) | 10 / 106 (9%) |
| GEP Centrosome Index >= 3 | 57/176 (33%) | 13 / 106 (12%) |
| GEP CD-1 subgroup | 12/176 (7%) | 3 / 106 (3%) |
| GEP CD-2 subgroup | 22/176 (12%) | 15 / 106 (14%) |
| GEP HY subgroup | 50/176 (28%) | 36 / 106 (34%) |
| GEP LB subgroup | 29/176 (16%) | 22 / 106 (21%) |
| GEP PR subgroup | 25/176 (14%) | 9 / 106 (8%) |
| GEP MF subgroup | 15/176 (9%) | 8 / 106 (8%) |
| GEP MS subgroup | 23/ 176 (13%) | 13 / 106 (12%) |

**Supplementary Table 1**: Baseline Characteristics of TT3a in Current and Omitted data
