# Supplementary material for: Assessment of Total Lesion Glycolysis by 18F FDG PET/CT Significantly Improves Prognostic Value of GEP and ISS in Myeloma
Source: Oxford University Press journal article supplement (doi:10.1158/1078-0432.ccr-16-0235), 2016-10-03
Supplement: 10780432ccr160235-sup-161640_2_supp_3682538_zz6dkg.docx [file 10780432ccr160235-sup-161640_2_supp_3682538_zz6dkg.docx]

**Supplementary Table 1.** Baseline characteristics of TT3a in Current and Omitted Data

**Supplementary Figure 1. A**. The distribution of TLG by molecular subgroup. On the histogram the blue dashed line represents the TLG cut point of 205 and the red dashed line the TLG cut point of 620. The table below shows the percentages and numbers of patients in each group. The Kruskal-Wallis p-value is significant indicating there is a difference in TLG amongst the subgroups **B.** PFS and OS for Baseline PET Focal Lesions **C.** Complete response duration for Number of PET lesions, TLG and MTV. **D.** PFS and OS for Baseline MTV. **E**. PFS and
